# Supplementary material for: Mobile outreach testing for COVID-19 in twenty homeless shelters in Toronto, Canada
Source: medRxiv preprint, doi:10.1101/2020.11.23.20235465, version 1 (2020-11-24)

**Appendix**

**Exhibit 1: Sample CAC data collection form**

**Exhibit 2: Shelter Positivity Rate vs. Weekly Positivity Rate in Toronto**


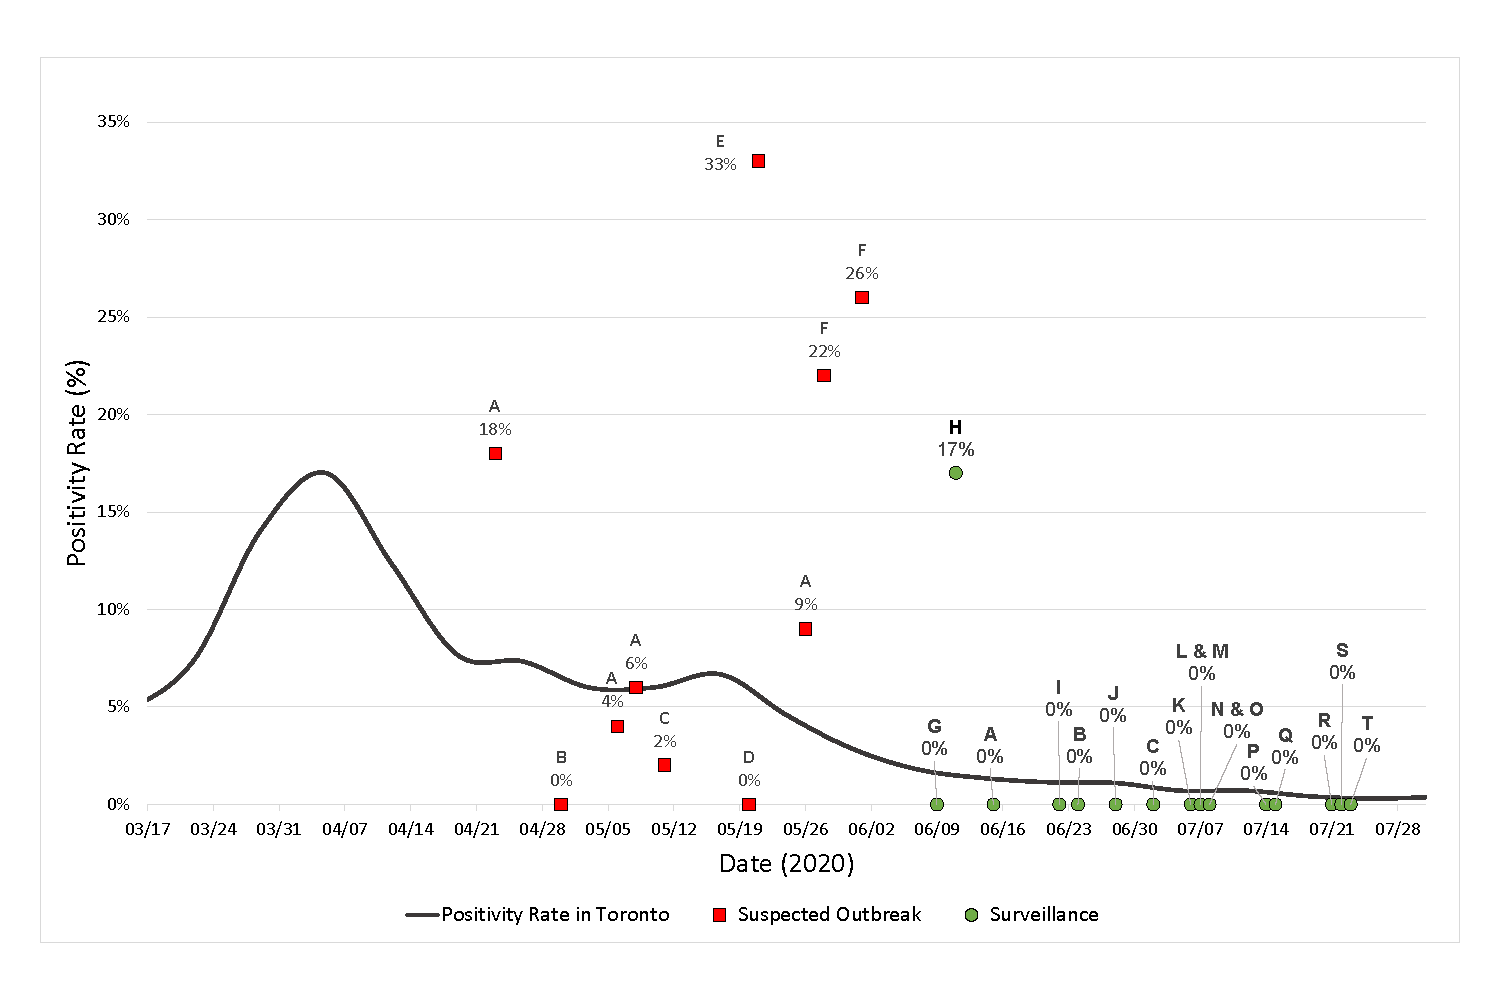

Supplement: Appendices [file 235465_file03.docx]
